# Supplementary material
Source: PubMed Central journal article supplement (PMC4394017)
Supplement: NIHMS640625-supplement-2.pdf [file NIHMS640625-supplement-2.pdf]

**Supplemental Table 1. Information on mice used for behavioral analysis**

| Control (Fig 1) | Tsc1 <sup>flx/flx</sup> ; CaMKII (Fig 1) | Control (Fig 6) | Tsc1 <sup>flx/flx</sup> ; Slc6a4 (Fig 6) | Control (Fig 8) | Tsc1 <sup>flx/flx</sup> ; Slc6a4 (Fig 8) | Tsc1 <sup>flx/flx</sup> ; Slc6a4 + Rapamycin (Fig 8) | Tsc1 <sup>flx/flx</sup> ; Slc6a4 + Fluoxetine (Fig 8) |
|-----------------|------------------------------------------|-----------------|------------------------------------------|-----------------|------------------------------------------|------------------------------------------------------|-------------------------------------------------------|
| M - Litter 1    | M - Litter 1                             | M - Litter 5    | M - Litter 5                             | M - Litter 10   | M - Litter 10                            | M - Litter 10                                        | M - Litter 11                                         |
| M - Litter 2    | M - Litter 2                             | M - Litter 6    | M - Litter 6                             | M - Litter 11   | M - Litter 12                            | M - Litter 13                                        | M - Litter 14                                         |
| M - Litter 2    | M - Litter 3                             | M - Litter 7    | M - Litter 7                             | M - Litter 12   | M - Litter 14                            | M - Litter 15                                        | M - Litter 16                                         |
| M - Litter 3    | M - Litter 3                             | M - Litter 8    | M - Litter 8                             | M - Litter 14   | M - Litter 16                            | M - Litter 16                                        | M - Litter 17                                         |
| M - Litter 3    | M - Litter 4                             | M - Litter 9    | M - Litter 9                             | M - Litter 15   | M - Litter 18                            | M - Litter 18                                        | M - Litter 18                                         |
| M - Litter 4    | M - Litter 4                             | F - Litter 5    | F - Litter 6                             | M - Litter 16   | F - Litter 10                            | M - Litter 18                                        | F - Litter 11                                         |
| F - Litter 1    | F - Litter 2                             | F - Litter 6    | F - Litter 6                             | F - Litter 10   | F - Litter 11                            | F - Litter 12                                        | F - Litter 12                                         |
| F - Litter 2    | F - Litter 2                             | F - Litter 7    | F - Litter 7                             | F - Litter 11   | F - Litter 12                            | F - Litter 13                                        | F - Litter 13                                         |
| F - Litter 2    | F - Litter 3                             | F - Litter 8    | F - Litter 8                             | F - Litter 13   | F - Litter 13                            | F - Litter 14                                        | F - Litter 15                                         |
| F - Litter 3    | F - Litter 4                             | F - Litter 10   | F - Litter 9                             | F - Litter 15   | F - Litter 15                            | F - Litter 16                                        | F - Litter 17                                         |
| F - Litter 4    |                                          |                 | F - Litter 10                            |                 |                                          | F - Litter 18                                        |                                                       |

Supplemental Table 1. Litter number and gender of mice used in all behavioral experiments. Male mice are indicated by M and are highlighted in blue, female mice and indicated by an F and are highlighted in red.

**Supplemental Figure 1. Frequency of seizures in Tsc1<sup>flx/flx</sup>;CaMKII $\alpha$ -cre mice**

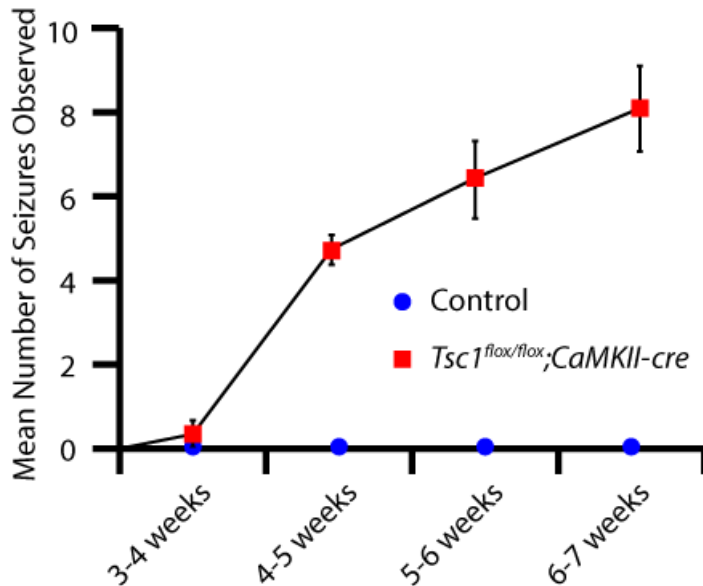

**Supplemental Figure 1.** Mean number of seizure observed by video recording in a 12 hour session over the time course of 3-7 weeks postnatal. Control mice are shown as blue circle, while Tsc1<sup>flx/flx</sup>;CaMKII $\alpha$ -

*cre* mice are red squares. All  $Tsc1^{flox/flox};CaMKII\alpha\text{-cre}$  mice developed spontaneous seizures by week 5-6.  
N=3
